# Supplementary material for: Qualitative and Quantitative NAD+ Metabolomics Lead to Discovery of Multiple Functional Nicotinate N-Glycosyltransferase in Arabidopsis
Source: PubMed Central journal article supplement (PMC6776627; doi:10.3389/fpls.2019.01164), 2019-09-27
Supplement: Image_1.pdf [file Image_1.pdf]

## SUPPLEMENTAL DATA

Supplemental Table 1. The MRM Settings and Retention Time for Metabolites Analyzed in This Study.

| Metabolite    | RT (min) <sup>a</sup> | Prec Ion | Prod Ion | Dwell | Frag (V) | CE (V) | Cell Acc (V) | Polarity |
|---------------|-----------------------|----------|----------|-------|----------|--------|--------------|----------|
| <b>NaAD</b>   | 8.53                  | 665      | 136      | 30    | 380      | 35     | 3            | Positive |
| <b>NAD</b>    | 8.61                  | 664      | 136      | 30    | 380      | 37     | 3            | Positive |
| <b>NaMN</b>   | 8.64                  | 336      | 124      | 30    | 380      | 13     | 3            | Positive |
| <b>NMN</b>    | 8.81                  | 335      | 123      | 30    | 380      | 8      | 3            | Positive |
| <b>NAOG</b>   | 3.78                  | 286      | 124      | 30    | 380      | 30     | 3            | Positive |
| <b>NANG</b>   | 8.57                  | 286      | 124      | 30    | 380      | 11     | 3            | Positive |
| <b>NaR</b>    | 8.15                  | 256      | 124      | 30    | 380      | 9      | 3            | Positive |
| <b>NR</b>     | 8.21                  | 255      | 123      | 30    | 380      | 9      | 3            | Positive |
| <b>NA</b>     | 5.79                  | 124      | 80       | 30    | 380      | 20     | 3            | Positive |
| <b>NAM</b>    | 1.21                  | 123      | 80       | 30    | 380      | 13     | 3            | Positive |
| <b>MeNA</b>   | 1.43 <sup>b</sup>     | 138      | 52       | 30    | 380      | 50     | 3            | Positive |
| <b>Tg</b>     | 7.48                  | 138      | 92       | 30    | 380      | 22     | 3            | Positive |
| <b>NaNP</b>   | 8.42                  | 256      | 124      | 30    | 380      | 9      | 3            | Positive |
| <b>NaMRha</b> | 8.25                  | 270      | 124      | 30    | 380      | 12     | 3            | positive |

<sup>a</sup> Prec Ion: Precursor Ion, Prod Ion: Product Ion, Frag: Fragmentor Voltage, CE: Collision Energy, Cell Acc: Cell Accelerator Voltage, RT: Retention Time.

<sup>b</sup> The retention time of MeNA was obtained with different LC-MS program (see Wu et al., 2018).

**Supplemental Table 2. Primers Used in This Study.**

| Primer Name     | Sequence information (5' to 3') <sup>1</sup>                                                | Function                          |
|-----------------|---------------------------------------------------------------------------------------------|-----------------------------------|
| 76C5FOR         | <u>GGAAATTC</u> ATGGAGAAGAGTAATGGCCTTCGAGTGA (EcoR I site was underlined)                   | Protein expression by pMal-c2x    |
| 76C5REV         | GCTCTAG <u>ACT</u> AAAAAGATGATATATAATCAATCAAATTTGTAAACGATTG (Xba I site was underlined)     |                                   |
| 76C5F1_site mut | TGGGCTCCGCAACAA <u>GAG</u> GTTCTAAAGCATCGAGCCATTGG                                          | Site-directed mutagenesis of 76C5 |
| 76C5R1_site mut | TCGATGCTTTAGAAC <u>CTC</u> TTGTTGCGGAGCCCATTTAC                                             |                                   |
| 76C5F2_site mut | CACATAATGGTTGGAAC <u>TCG</u> ACTGTTGAGAGTGTGGTGAAGGC                                        | Site-directed mutagenesis of 76C5 |
| 76C5R2_site mut | CTCTCAACAGTCGAG <u>TTT</u> CCAACCATTATGTGTCAAGGAATCCC                                       |                                   |
| 76C5F3_site mut | AGAGTGTGGTGAAG <u>GGC</u> GTCCCTATGATCTGTTTGCCTTTTC                                         | Site-directed mutagenesis of 76C5 |
| 76C5R3_site mut | ACAGATCATAGGGAC <u>GCC</u> TTCAAAACACTCTCAACAGTCGAG                                         |                                   |
| 76C4FOR         | <u>GGAAATTC</u> ATGGAGAAGAGTAATGGCCTGCGAGT (EcoR I site was underlined)                     | Protein expression by pMal-c2x    |
| 76C4REV         | GCTCTAG <u>ACT</u> AGAAAGATGATATATAATTAATCAAATTTGTAGAGATTGATATG (Xba I site was underlined) |                                   |
| 76C4F1_site mut | GGGCTCCACAACAA <u>GAC</u> GTTCTAAAGCATCGAGCTATTGGAGG                                        | Site-directed mutagenesis of 76C4 |
| 76C4R1_site mut | TCGATGCTTTAGAAC <u>GTC</u> TTGTTGTGGAGCCCATTTCACTATCT                                       |                                   |
| 76C4F2_site mut | CACATAATGGTTGGAG <u>CTC</u> GACGTTGAGAGTGTGGTGA                                             | Site-directed mutagenesis of 76C4 |
| 76C4R2_site mut | CACTCTAACCGTCGAG <u>GCT</u> CCAACCATTATGTGTCAAGAAACCT                                       |                                   |
| 76C4F3_site mut | AGAGTGTGGTGAAG <u>GCA</u> GTCCCTATGATCTGTTTGCCTTTTCG                                        | Site-directed mutagenesis of 76C4 |
| 76C4R3_site mut | ACAGATCATAGGGAC <u>TGC</u> TTCAAAACACTCTCAACCGTCG                                           |                                   |

<sup>1</sup> mutated nucleotide and corresponding amino acid codon were highlighted.

**Supplemental Table 3. List of 24 tissues used for NAD metabolomics analysis in this study.**

| <b>Sample name</b> | <b>Tissue</b>                      | <b>Age</b> | <b>Growth Condition</b> |
|--------------------|------------------------------------|------------|-------------------------|
| Sample_1           | Young Seedlings                    | 8 days     | ½ MS, long day (16/8)   |
| Sample_2           | Young seedling leaf                | 8 days     | ½ MS, long day (16/8)   |
| Sample_3           | Young seedling roots               | 8 days     | ½ MS, long day (16/8)   |
| Sample_4           | Young Seedlings                    | 15 days    | ½ MS, long day (16/8)   |
| Sample_5           | Young seedling leaf                | 15 days    | ½ MS, long day (16/8)   |
| Sample_6           | Young seedling roots               | 15 days    | ½ MS, long day (16/8)   |
| Sample_7           | Young Seedlings                    | 21 days    | ½ MS, long day (16/8)   |
| Sample_8           | Young seedling leaf                | 21 days    | ½ MS, long day (16/8)   |
| Sample_9           | Young seedling roots               | 21 days    | ½ MS, long day (16/8)   |
| Sample_10          | Rosette leaf                       | 30 days    | Soil, long day (16/8)   |
| Sample_11          | Cauline leaf                       | 30 days    | Soil, long day (16/8)   |
| Sample_12          | Senescent leaves                   | 35 days    | Soil, long day (16/8)   |
| Sample_13          | 1st node                           | 35 days    | Soil, long day (16/8)   |
| Sample_14          | Stem, 2nd internode                | 35 days    | Soil, long day (16/8)   |
| Sample_15          | Inflorescence                      | 35 days    | Soil, long day (16/8)   |
| Sample_16          | Flowers stage 12                   | 30 days    | Soil, long day (16/8)   |
| Sample_17          | Flowers stage 13                   | 30 days    | Soil, long day (16/8)   |
| Sample_18          | Flowers stage 14                   | 30 days    | Soil, long day (16/8)   |
| Sample_19          | Flowers stage 15                   | 30 days    | Soil, long day (16/8)   |
| Sample_20          | Siliques, with seeds stage 3 and 4 | 30 days    | Soil, long day (16/8)   |
| Sample_21          | Siliques, with seeds stage 5       | 30 days    | Soil, long day (16/8)   |
| Sample_22          | Adult roots                        | 35 days    | Soil, long day (16/8)   |
| Sample_23          | Mature seeds                       | 42 days    | Soil, long day (16/8)   |
| Sample_24          | Fresh harvested pollen             | 30 days    | Soil, long day (16/8)   |

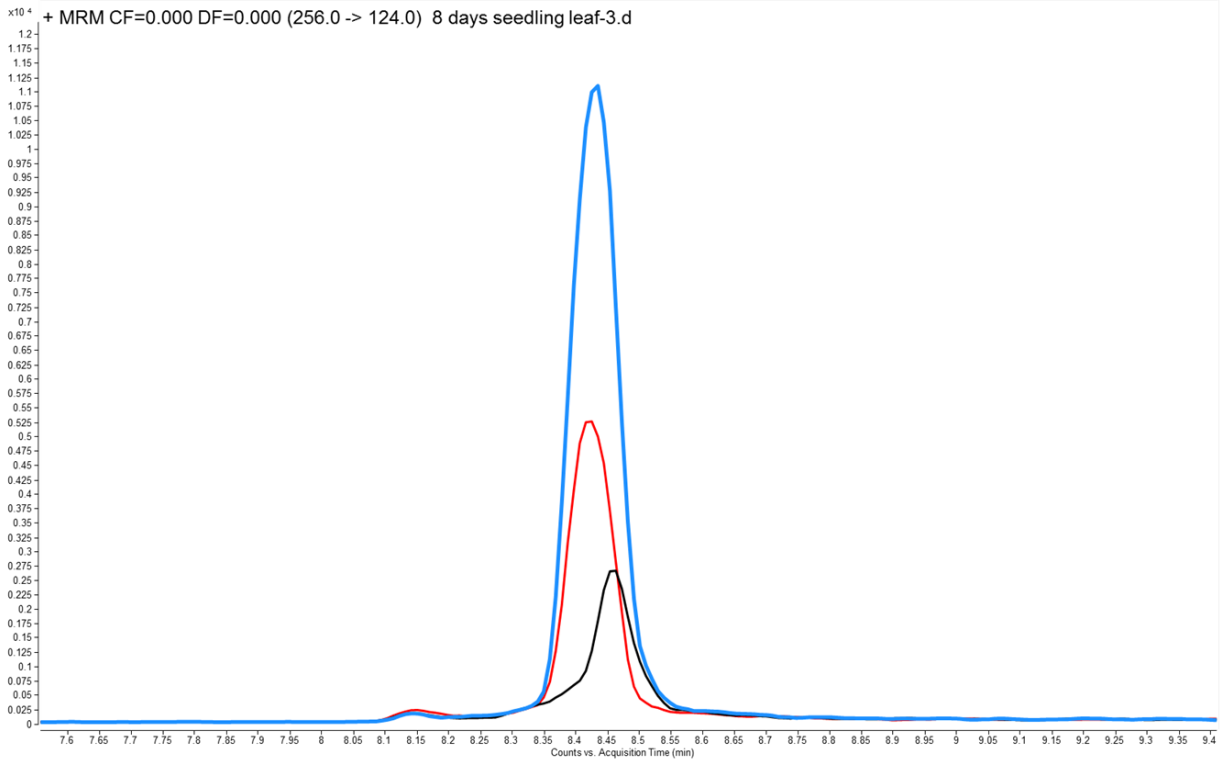

**Supplemental Figure 1.** LC-QQQ-MS analysis (MRM,  $m/z$  256 > 124) of nicotine *N*-arabinside (black line), nicotine *N*-xyloside (red line) and the extract from leaf tissue of 8-day-old seedlings (blue line). Both nicotine *N*-arabinside and nicotine *N*-xyloside are prepared by enzymatic reactions catalyzed by UGT76C5.

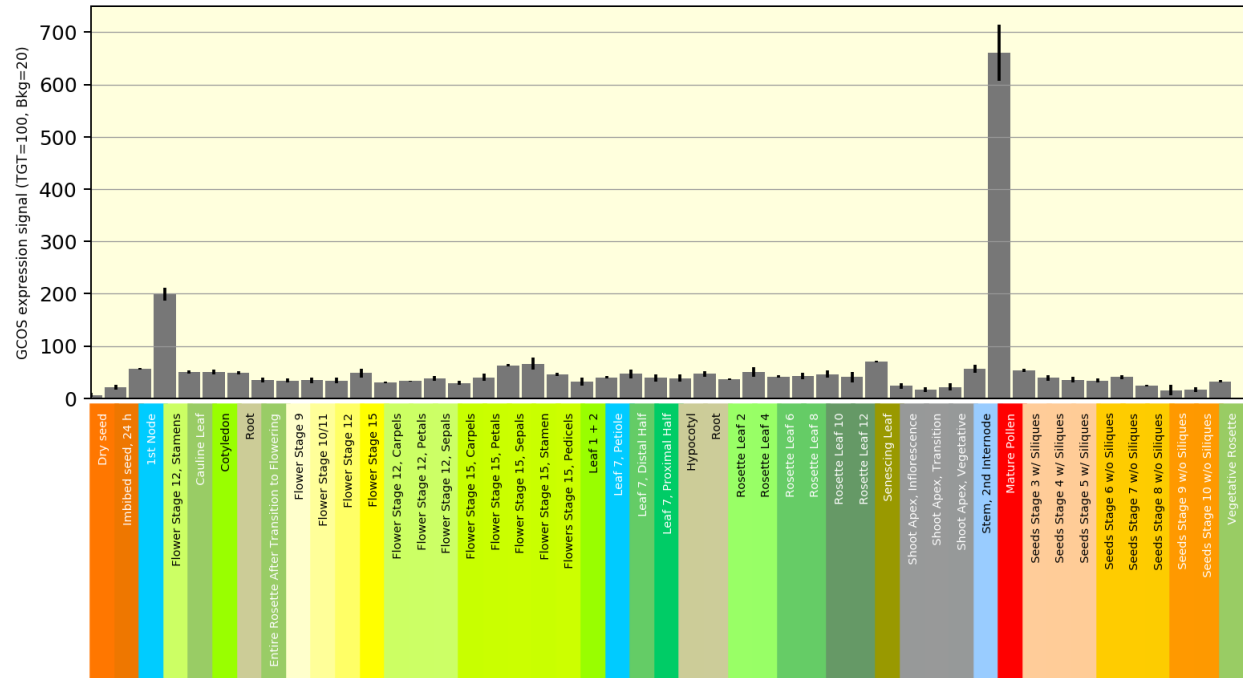

**Supplemental Figure 2.** Expression pattern of *At3g13050* in Arabidopsis, which was extracted from TAIR website (<https://www.arabidopsis.org/>; Winter et al., 2007).

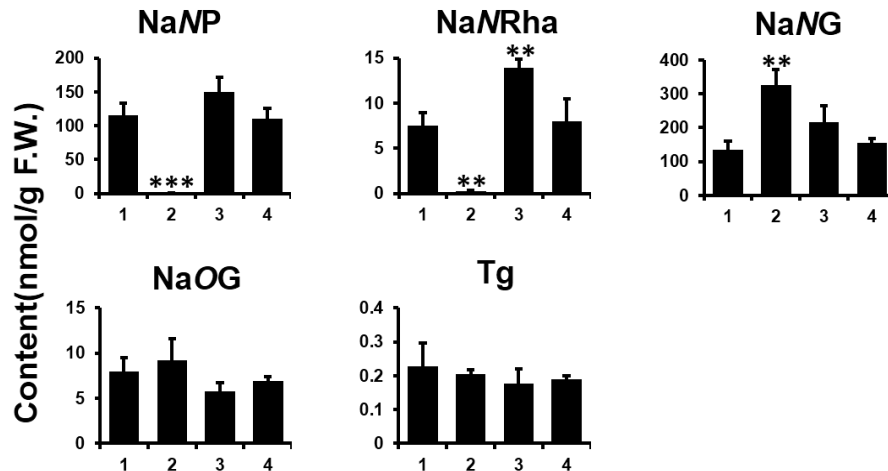

**Supplemental Figure 3. Quantification of nicotinate conjugates secreted in the liquid medium.** In these experiments, around 3 mg of seeds, after sterilized with 75% alcohol and washed with ddH<sub>2</sub>O five times, were grown in 20 mL ½ MS liquid medium in a growth chamber for 15 days. The plant materials were weighed and 500 µL of liquid medium was mixed with equal volume of acetonitrile. The liquid samples were injected on UPLC-MS/MS for analysis after 10 minutes of maximum speed centrifugation with a microcentrifuge and filtered through a 0.22-µm syringe filter. Bars shown mean ± SD ( $n = 3$ ). Asterisks indicate significant differences from the Col-0 plants; \*\*\*  $P < 0.001$ , \*\*  $P < 0.01$  (two-tailed Student's  $t$  test). F.W., fresh weight.

## REFERENCES

- Winter D, Vinegar B, Nahal H, Ammar R, Wilson GV, Provart NJ (2007) An “electronic fluorescent pictograph” browser for exploring and analyzing large-scale biological data sets. *PLoS One* 2, e718. doi: 10.1371/journal.pone.0000718
- Wu, R.R., Zhang, F.X., Liu, L.Y., Li, W., Pichersky, E., and Wang, G.D. (2018). MeNA, controlled by reversible methylation of nicotinate, is an NAD precursor that undergoes long-distance transport in Arabidopsis. *Mol. Plant* 11, 1264-1277. doi: 10.1016/j.molp.2018.07.003
